# Supplementary material for: Redox-Active Inverse Crowns for Small Molecule Activation
Source: Research Square preprint supplement (doi:10.21203/rs.3.rs-4674152/v1), 2024-08-07

## checkCIF/PLATON report

Structure factors have been supplied for datablock(s) hasj220913a

THIS REPORT IS FOR GUIDANCE ONLY. IF USED AS PART OF A REVIEW PROCEDURE FOR PUBLICATION, IT SHOULD NOT REPLACE THE EXPERTISE OF AN EXPERIENCED CRYSTALLOGRAPHIC REFEREE.

No syntax errors found.      CIF dictionary      Interpreting this report

### Datablock: hasj220913a

---

Bond precision:      C-C = 0.0046 Å      Wavelength=1.54184

Cell:                      a=19.4688 (3)      b=22.1144 (3)      c=45.7469 (5)  
                             alpha=90      beta=98.7055 (12)      gamma=90

Temperature:      100 K

|                        | Calculated                           | Reported               |
|------------------------|--------------------------------------|------------------------|
| Volume                 | 19469.0 (5)                          | 19469.0 (4)            |
| Space group            | P 21/n                               | P 1 21/n 1             |
| Hall group             | -P 2yn                               | -P 2yn                 |
| Moiety formula         | C43 H69 Mg N2, C12 H36 N2<br>Na3 Si4 | C55 H105 Mg N4 Na3 Si4 |
| Sum formula            | C55 H105 Mg N4 Na3 Si4               | C55 H105 Mg N4 Na3 Si4 |
| Mr                     | 1028.07                              | 1028.06                |
| Dx, g cm <sup>-3</sup> | 1.052                                | 1.052                  |
| Z                      | 12                                   | 12                     |
| Mu (mm <sup>-1</sup> ) | 1.394                                | 1.394                  |
| F000                   | 6768.0                               | 6768.0                 |
| F000'                  | 6799.23                              |                        |
| h, k, lmax             | 23, 26, 54                           | 23, 26, 54             |
| Nref                   | 34771                                | 34611                  |
| Tmin, Tmax             | 0.627, 0.913                         | 0.262, 1.000           |
| Tmin'                  | 0.509                                |                        |

Correction method= # Reported T Limits: Tmin=0.262 Tmax=1.000  
AbsCorr = GAUSSIAN

Data completeness= 0.995      Theta(max)= 67.079

R(reflections)= 0.0736 ( 25418)

wR2(reflections)=  
0.2166 ( 34611)

S = 1.022

Npar= 2241

---

The following ALERTS were generated. Each ALERT has the format

**test-name\_ALERT\_alert-type\_alert-level.**

Click on the hyperlinks for more details of the test.

---

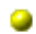

### Alert level C

|                                                             |                                                 |              |
|-------------------------------------------------------------|-------------------------------------------------|--------------|
| PLAT042_ALERT_1_C                                           | Calc. and Reported MoietyFormula Strings Differ | Please Check |
| Calc: C43 H69 Mg N2, C12 H36 N2 Na3 Si4                     |                                                 |              |
| Rep.: C55 H105 Mg N4 Na3 Si4                                |                                                 |              |
| PLAT241_ALERT_2_C                                           | High 'MainMol' Ueq as Compared to Neighbors of  | Na9 Check    |
| PLAT241_ALERT_2_C                                           | High 'MainMol' Ueq as Compared to Neighbors of  | Na3 Check    |
| PLAT242_ALERT_2_C                                           | Low 'MainMol' Ueq as Compared to Neighbors of   | Si5 Check    |
| PLAT242_ALERT_2_C                                           | Low 'MainMol' Ueq as Compared to Neighbors of   | Si6 Check    |
| PLAT242_ALERT_2_C                                           | Low 'MainMol' Ueq as Compared to Neighbors of   | Si10 Check   |
| PLAT340_ALERT_3_C                                           | Low Bond Precision on C-C Bonds .....           | 0.00459 Ang. |
| PLAT906_ALERT_3_C                                           | Large K Value in the Analysis of Variance ..... | 5.379 Check  |
| PLAT911_ALERT_3_C                                           | Missing FCF Refl Between Thmin & STh/L= 0.597   | 157 Report   |
| 20 7 0, 16 16 0, 17 16 0, 18 16 0, 16 17 0, -23 0 1,        |                                                 |              |
| 17 4 1, 20 4 1, 18 6 1, -18 16 1, -17 16 1, -16 16 1,       |                                                 |              |
| 16 16 1, 17 16 1, -16 17 1, -15 17 1, 16 17 1, -18 3 2,     |                                                 |              |
| -17 5 2, -20 11 2, -18 11 2, -18 16 2, -17 16 2, -16 16 2,  |                                                 |              |
| 17 16 2, -16 17 2, -15 17 2, -23 0 3, -18 8 3, -18 16 3,    |                                                 |              |
| -17 16 3, -16 16 3, -15 16 3, 17 16 3, -16 17 3, -15 17 3,  |                                                 |              |
| -14 17 3, -17 12 4, -18 16 4, -17 16 4, -16 16 4, -15 16 4, |                                                 |              |
| 17 16 4, -16 17 4, -15 17 4, -14 17 4, -12 22 4, -23 0 5,   |                                                 |              |
| -22 5 5, -21 9 5, -19 15 5, -18 16 5, -17 16 5, -16 17 5,   |                                                 |              |
| -15 17 5, -14 17 5, -13 17 5, 12 22 5, -21 4 6, -20 7 6,    |                                                 |              |
| 18 15 6, -18 16 6, -16 17 6, -15 17 6, -14 17 6, -13 17 6,  |                                                 |              |
| 17 17 6, 14 20 6, 13 21 6, 11 22 6, 12 22 6, -11 23 6,      |                                                 |              |
| -2 26 6, -23 0 7, -20 11 7, -18 16 7, -16 17 7, -15 17 7,   |                                                 |              |
| 16 18 7, 15 19 7, 14 20 7, 12 21 7, 13 21 7, 11 22 7,       |                                                 |              |
| -19 10 8, -20 11 8, -17 14 8, 18 15 8, -18 16 8, 17 16 8,   |                                                 |              |
| -16 17 8, 15 19 8, 14 20 8, 12 21 8, 13 21 8, 11 22 8,      |                                                 |              |

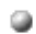

### Alert level G

|                   |                                                  |               |
|-------------------|--------------------------------------------------|---------------|
| PLAT002_ALERT_2_G | Number of Distance or Angle Restraints on AtSite | 72 Note       |
| PLAT003_ALERT_2_G | Number of Uiso or U(i,j) Restrained non-H Atoms  | 68 Report     |
| PLAT072_ALERT_2_G | SHELXL First Parameter in WGHT Unusually Large   | 0.11 Report   |
| PLAT083_ALERT_2_G | SHELXL Second Parameter in WGHT Unusually Large  | 15.55 Why ?   |
| PLAT176_ALERT_4_G | The CIF-Embedded .res File Contains SADI Records | 6 Report      |
| PLAT178_ALERT_4_G | The CIF-Embedded .res File Contains SIMU Records | 7 Report      |
| PLAT187_ALERT_4_G | The CIF-Embedded .res File Contains RIGU Records | 2 Report      |
| PLAT188_ALERT_3_G | A Non-default SIMU Restraint Value has been used | 0.0200 Report |
| PLAT188_ALERT_3_G | A Non-default SIMU Restraint Value has been used | 0.0200 Report |
| PLAT188_ALERT_3_G | A Non-default SIMU Restraint Value has been used | 0.0200 Report |
| PLAT188_ALERT_3_G | A Non-default SIMU Restraint Value has been used | 0.0300 Report |
| PLAT188_ALERT_3_G | A Non-default SIMU Restraint Value has been used | 0.0200 Report |
| PLAT188_ALERT_3_G | A Non-default SIMU Restraint Value has been used | 0.0200 Report |
| PLAT188_ALERT_3_G | A Non-default SIMU Restraint Value has been used | 0.0200 Report |
| PLAT190_ALERT_3_G | A Non-default RIGU Restraint Value for First Par | 0.0020 Report |
| PLAT190_ALERT_3_G | A Non-default RIGU Restraint Value for SecondPar | 0.0020 Report |
| PLAT301_ALERT_3_G | Main Residue Disorder .....(Resd 1)              | 22% Note      |
| PLAT301_ALERT_3_G | Main Residue Disorder .....(Resd 2)              | 11% Note      |
| PLAT302_ALERT_4_G | Anion/Solvent/Minor-Residue Disorder (Resd 4)    | 38% Note      |
| PLAT302_ALERT_4_G | Anion/Solvent/Minor-Residue Disorder (Resd 5)    | 43% Note      |

|                                                                    |                |                  |       |                 |
|--------------------------------------------------------------------|----------------|------------------|-------|-----------------|
| PLAT410_ALERT_2_G Short Intra H...H Contact                        | H14            | ..H19A           | .     | 2.08 Ang.       |
|                                                                    |                | x,y,z =          | 1_555 | Check           |
| PLAT410_ALERT_2_G Short Intra H...H Contact                        | H16            | ..H26A           | .     | 2.12 Ang.       |
|                                                                    |                | x,y,z =          | 1_555 | Check           |
| PLAT412_ALERT_2_G Short Intra XH3 .. XHn                           | H5A            | ..H24A           | .     | 2.07 Ang.       |
|                                                                    |                | x,y,z =          | 1_555 | Check           |
| PLAT412_ALERT_2_G Short Intra XH3 .. XHn                           | H6A            | ..H18A           | .     | 2.08 Ang.       |
|                                                                    |                | x,y,z =          | 1_555 | Check           |
| PLAT412_ALERT_2_G Short Intra XH3 .. XHn                           | H7C            | ..H24A           | .     | 1.99 Ang.       |
|                                                                    |                | x,y,z =          | 1_555 | Check           |
| PLAT412_ALERT_2_G Short Intra XH3 .. XHn                           | H64A           | ..H92B           | .     | 2.09 Ang.       |
|                                                                    |                | x,y,z =          | 1_555 | Check           |
| PLAT412_ALERT_2_G Short Intra XH3 .. XHn                           | H66C           | ..H92B           | .     | 2.14 Ang.       |
|                                                                    |                | x,y,z =          | 1_555 | Check           |
| PLAT412_ALERT_2_G Short Intra XH3 .. XHn                           | H99A           | ..H17P           | .     | 2.08 Ang.       |
|                                                                    |                | x,y,z =          | 1_555 | Check           |
| PLAT720_ALERT_4_G Number of Unusual/Non-Standard Labels .....      |                |                  |       | 7 Note          |
|                                                                    | H1AA           | H1AH             | H1AI  | H1AF            |
|                                                                    |                | H1AG             | H1AB  | H1AC            |
| PLAT860_ALERT_3_G Number of Least-Squares Restraints .....         |                |                  |       | 2305 Note       |
| PLAT909_ALERT_3_G Percentage of I>2sig(I) Data at Theta(Max) Still |                |                  |       | 61% Note        |
| PLAT910_ALERT_3_G Missing # of FCF Reflection(s) Below Theta(Min). |                |                  |       | 3 Note          |
|                                                                    | -1             | 0                | 1,    | 0               |
|                                                                    |                | 0                | 1     | 1,              |
|                                                                    |                |                  | 0     | 0               |
|                                                                    |                |                  |       | 2,              |
| PLAT941_ALERT_3_G Average HKL Measurement Multiplicity .....       |                |                  |       | 3.1 Low         |
| PLAT969_ALERT_5_G The 'Henn et al.' R-Factor-gap value .....       |                |                  |       | 3.018 Note      |
|                                                                    | Predicted wR2: | Based on SigI**2 | 7.18  | or SHELX Weight |
|                                                                    |                |                  | 21.20 |                 |
| PLAT978_ALERT_2_G Number C-C Bonds with Positive Residual Density. |                |                  |       | 0 Info          |
| PLAT992_ALERT_5_G Repd & Actual _reflns_number_gt Values Differ by |                |                  |       | 2 Check         |

---

0 **ALERT level A** = Most likely a serious problem - resolve or explain  
 0 **ALERT level B** = A potentially serious problem, consider carefully  
 9 **ALERT level C** = Check. Ensure it is not caused by an omission or oversight  
 36 **ALERT level G** = General information/check it is not something unexpected

1 ALERT type 1 CIF construction/syntax error, inconsistent or missing data  
 18 ALERT type 2 Indicator that the structure model may be wrong or deficient  
 18 ALERT type 3 Indicator that the structure quality may be low  
 6 ALERT type 4 Improvement, methodology, query or suggestion  
 2 ALERT type 5 Informative message, check

---

It is advisable to attempt to resolve as many as possible of the alerts in all categories. Often the minor alerts point to easily fixed oversights, errors and omissions in your CIF or refinement strategy, so attention to these fine details can be worthwhile. In order to resolve some of the more serious problems it may be necessary to carry out additional measurements or structure refinements. However, the purpose of your study may justify the reported deviations and the more serious of these should normally be commented upon in the discussion or experimental section of a paper or in the "special\_details" fields of the CIF. checkCIF was carefully designed to identify outliers and unusual parameters, but every test has its limitations and alerts that are not important in a particular case may appear. Conversely, the absence of alerts does not guarantee there are no aspects of the results needing attention. It is up to the individual to critically assess their own results and, if necessary, seek expert advice.

### **Publication of your CIF in IUCr journals**

A basic structural check has been run on your CIF. These basic checks will be run on all CIFs submitted for publication in IUCr journals (*Acta Crystallographica*, *Journal of Applied Crystallography*, *Journal of Synchrotron Radiation*); however, if you intend to submit to *Acta Crystallographica Section C* or *E* or *IUCrData*, you should make sure that full publication checks are run on the final version of your CIF prior to submission.

### **Publication of your CIF in other journals**

Please refer to the *Notes for Authors* of the relevant journal for any special instructions relating to CIF submission.

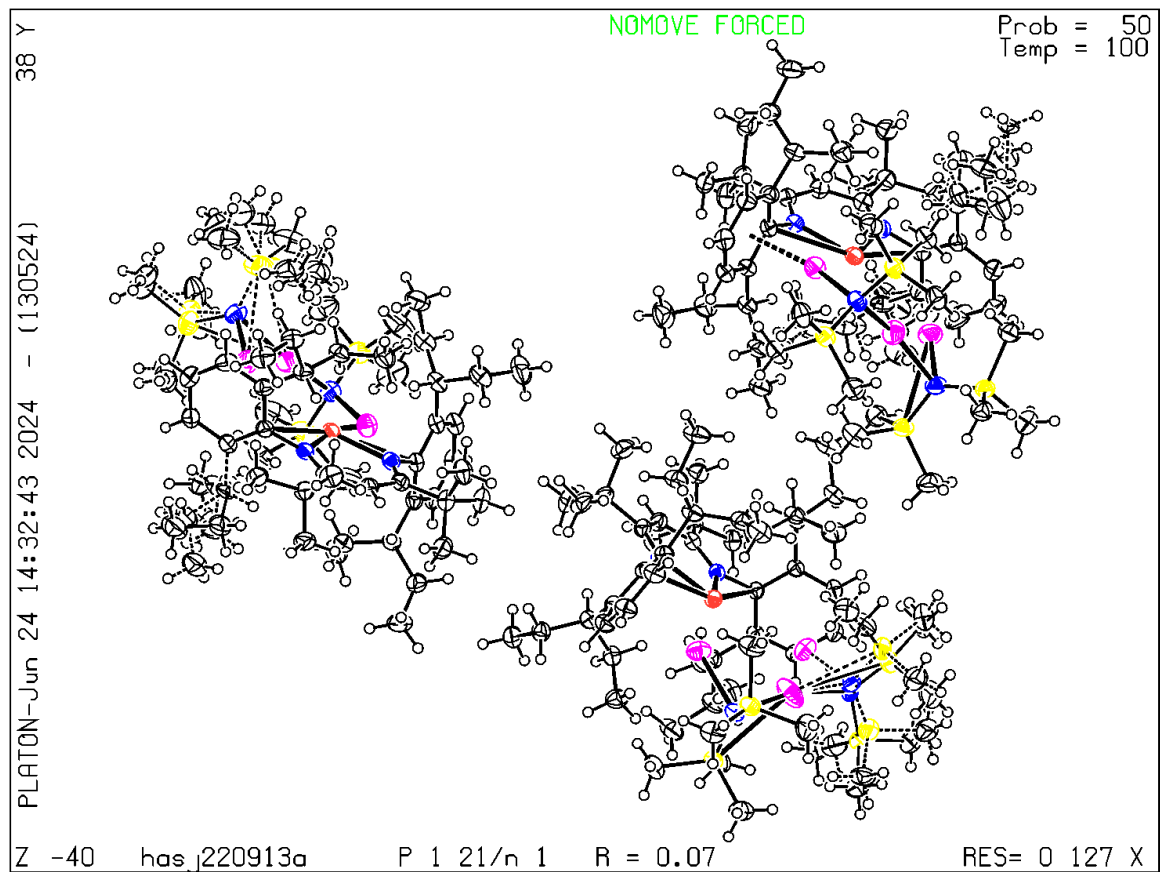

## checkCIF/PLATON report

Structure factors have been supplied for datablock(s) hasj220919a

THIS REPORT IS FOR GUIDANCE ONLY. IF USED AS PART OF A REVIEW PROCEDURE FOR PUBLICATION, IT SHOULD NOT REPLACE THE EXPERTISE OF AN EXPERIENCED CRYSTALLOGRAPHIC REFEREE.

No syntax errors found.      CIF dictionary      Interpreting this report

### Datablock: hasj220919a

---

|                        |                          |                          |               |
|------------------------|--------------------------|--------------------------|---------------|
| Bond precision:        | C-C = 0.0059 Å           | Wavelength=1.54184       |               |
| Cell:                  | a=20.4668 (2)            | b=14.4504 (2)            | c=21.7229 (3) |
|                        | alpha=90                 | beta=90                  | gamma=90      |
| Temperature:           | 100 K                    |                          |               |
|                        | Calculated               | Reported                 |               |
| Volume                 | 6424.62 (14)             | 6424.62 (14)             |               |
| Space group            | P c a 21                 | P c a 21                 |               |
| Hall group             | P 2c -2ac                | P 2c -2ac                |               |
| Moiety formula         | C55 H105 Mg N4 Na3 O Si4 | C55 H105 Mg N4 Na3 O Si4 |               |
| Sum formula            | C55 H105 Mg N4 Na3 O Si4 | C55 H105 Mg N4 Na3 O Si4 |               |
| Mr                     | 1044.07                  | 1044.06                  |               |
| Dx, g cm <sup>-3</sup> | 1.079                    | 1.079                    |               |
| Z                      | 4                        | 4                        |               |
| Mu (mm <sup>-1</sup> ) | 1.427                    | 1.427                    |               |
| F000                   | 2288.0                   | 2288.0                   |               |
| F000'                  | 2298.61                  |                          |               |
| h,k,lmax               | 25,17,26                 | 25,17,26                 |               |
| Nref                   | 12765[ 6563]             | 10974                    |               |
| Tmin,Tmax              | 0.850,0.895              | 0.841,1.000              |               |
| Tmin'                  | 0.806                    |                          |               |

Correction method= # Reported T Limits: Tmin=0.841 Tmax=1.000  
AbsCorr = GAUSSIAN

Data completeness= 1.67/0.86      Theta(max)= 72.695

R(reflections)= 0.0432( 10231)

wR2(reflections)=  
0.1189( 10974)

S = 1.038

Npar= 778

---

The following ALERTS were generated. Each ALERT has the format

**test-name\_ALERT\_alert-type\_alert-level.**

Click on the hyperlinks for more details of the test.

---

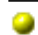

### Alert level C

|                   |                                                  |        |        |
|-------------------|--------------------------------------------------|--------|--------|
| PLAT094_ALERT_2_C | Ratio of Maximum / Minimum Residual Density .... | 2.13   | Report |
| PLAT220_ALERT_2_C | NonSolvent Resd 1 C Ueq(max)/Ueq(min) Range      | 4.1    | Ratio  |
| PLAT242_ALERT_2_C | Low 'MainMol' Ueq as Compared to Neighbors of    | Si1    | Check  |
| PLAT242_ALERT_2_C | Low 'MainMol' Ueq as Compared to Neighbors of    | Si2    | Check  |
| PLAT340_ALERT_3_C | Low Bond Precision on C-C Bonds .....            | 0.0059 | Ang.   |
| PLAT911_ALERT_3_C | Missing FCF Refl Between Thmin & STh/L= 0.600    | 4      | Report |
|                   | 11 15 0, 12 15 0, 0 3 4, 12 10 17,               |        |        |

---

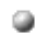

### Alert level G

|                   |                                                            |        |        |
|-------------------|------------------------------------------------------------|--------|--------|
| PLAT002_ALERT_2_G | Number of Distance or Angle Restraints on AtSite           | 28     | Note   |
| PLAT003_ALERT_2_G | Number of Uiso or U(i,j) Restrained non-H Atoms            | 17     | Report |
| PLAT176_ALERT_4_G | The CIF-Embedded .res File Contains SADI Records           | 4      | Report |
| PLAT178_ALERT_4_G | The CIF-Embedded .res File Contains SIMU Records           | 1      | Report |
| PLAT188_ALERT_3_G | A Non-default SIMU Restraint Value has been used           | 0.0200 | Report |
| PLAT230_ALERT_2_G | Hirshfeld Test Diff for C21 --C22 .                        | 6.8    | s.u.   |
| PLAT301_ALERT_3_G | Main Residue Disorder .....(Resd 1)                        | 21%    | Note   |
| PLAT303_ALERT_2_G | Full Occupancy Atom H42B with # Connections                | 2.00   | Check  |
| PLAT410_ALERT_2_G | Short Intra H...H Contact H14 ..H21B .                     | 2.14   | Ang.   |
|                   | x,y,z = 1_555                                              | Check  |        |
| PLAT410_ALERT_2_G | Short Intra H...H Contact H14 ..H21D .                     | 2.14   | Ang.   |
|                   | x,y,z = 1_555                                              | Check  |        |
| PLAT410_ALERT_2_G | Short Intra H...H Contact H19A ..H21C .                    | 2.13   | Ang.   |
|                   | x,y,z = 1_555                                              | Check  |        |
| PLAT412_ALERT_2_G | Short Intra XH3 .. XHn H18 ..H22F .                        | 1.90   | Ang.   |
|                   | x,y,z = 1_555                                              | Check  |        |
| PLAT412_ALERT_2_G | Short Intra XH3 .. XHn H49A ..H46F .                       | 1.91   | Ang.   |
|                   | x,y,z = 1_555                                              | Check  |        |
| PLAT432_ALERT_2_G | Short Inter X...Y Contact C22 ..C41 .                      | 3.16   | Ang.   |
|                   | 1-x,-y,-1/2+z = 2_654                                      | Check  |        |
| PLAT792_ALERT_1_G | Model has Chirality at C18 (Polar SpGr)                    | S      | Verify |
| PLAT860_ALERT_3_G | Number of Least-Squares Restraints .....                   | 762    | Note   |
| PLAT912_ALERT_4_G | Missing # of FCF Reflections Above STh/L= 0.600            | 102    | Note   |
| PLAT915_ALERT_3_G | No Flack x Check Done: Low Friedel Pair Coverage           | 73     | %      |
| PLAT933_ALERT_2_G | Number of HKL-OMIT Records in Embedded .res File           | 2      | Note   |
|                   | 10 13 11, 18 6-14,                                         |        |        |
| PLAT941_ALERT_3_G | Average HKL Measurement Multiplicity .....                 | 4.6    | Low    |
| PLAT969_ALERT_5_G | The 'Henn et al.' R-Factor-gap value .....                 | 3.468  | Note   |
|                   | Predicted wR2: Based on SigI**2 3.43 or SHELX Weight 11.45 |        |        |
| PLAT978_ALERT_2_G | Number C-C Bonds with Positive Residual Density.           | 1      | Info   |

---

0 **ALERT level A** = Most likely a serious problem - resolve or explain

0 **ALERT level B** = A potentially serious problem, consider carefully

6 **ALERT level C** = Check. Ensure it is not caused by an omission or oversight

22 **ALERT level G** = General information/check it is not something unexpected

1 ALERT type 1 CIF construction/syntax error, inconsistent or missing data

16 ALERT type 2 Indicator that the structure model may be wrong or deficient  
7 ALERT type 3 Indicator that the structure quality may be low  
3 ALERT type 4 Improvement, methodology, query or suggestion  
1 ALERT type 5 Informative message, check

---

---

It is advisable to attempt to resolve as many as possible of the alerts in all categories. Often the minor alerts point to easily fixed oversights, errors and omissions in your CIF or refinement strategy, so attention to these fine details can be worthwhile. In order to resolve some of the more serious problems it may be necessary to carry out additional measurements or structure refinements. However, the purpose of your study may justify the reported deviations and the more serious of these should normally be commented upon in the discussion or experimental section of a paper or in the "special\_details" fields of the CIF. checkCIF was carefully designed to identify outliers and unusual parameters, but every test has its limitations and alerts that are not important in a particular case may appear. Conversely, the absence of alerts does not guarantee there are no aspects of the results needing attention. It is up to the individual to critically assess their own results and, if necessary, seek expert advice.

### **Publication of your CIF in IUCr journals**

A basic structural check has been run on your CIF. These basic checks will be run on all CIFs submitted for publication in IUCr journals (*Acta Crystallographica*, *Journal of Applied Crystallography*, *Journal of Synchrotron Radiation*); however, if you intend to submit to *Acta Crystallographica Section C* or *E* or *IUCrData*, you should make sure that full publication checks are run on the final version of your CIF prior to submission.

### **Publication of your CIF in other journals**

Please refer to the *Notes for Authors* of the relevant journal for any special instructions relating to CIF submission.

---

**PLATON version of 13/05/2024; check.def file version of 04/05/2024**



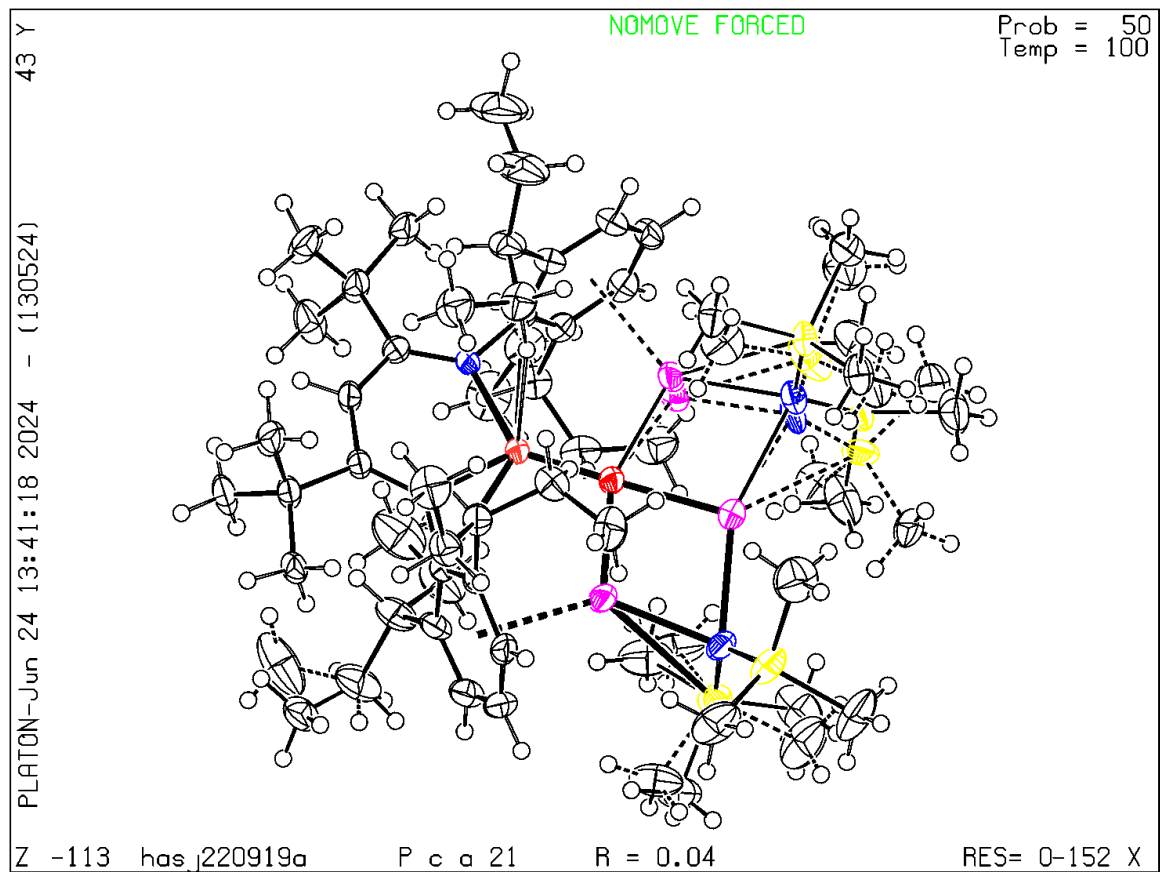

## checkCIF/PLATON report

Structure factors have been supplied for datablock(s) hasj220203b

THIS REPORT IS FOR GUIDANCE ONLY. IF USED AS PART OF A REVIEW PROCEDURE FOR PUBLICATION, IT SHOULD NOT REPLACE THE EXPERTISE OF AN EXPERIENCED CRYSTALLOGRAPHIC REFEREE.

No syntax errors found.      CIF dictionary      Interpreting this report

### Datablock: hasj220203b

---

|                        |                                     |                                     |
|------------------------|-------------------------------------|-------------------------------------|
| Bond precision:        | C-C = 0.0024 Å                      | Wavelength=1.54184                  |
| Cell:                  | a=12.1701(4)                        | b=12.4334(3)      c=18.6675(5)      |
|                        | alpha=79.887(2)                     | beta=75.914(3)      gamma=63.312(3) |
| Temperature:           | 100 K                               |                                     |
|                        | Calculated                          | Reported                            |
| Volume                 | 2440.70(14)                         | 2440.70(14)                         |
| Space group            | P -1                                | P -1                                |
| Hall group             | -P 1                                | -P 1                                |
| Moiety formula         | C86 H138 Mg2 N4 Na2 O2,<br>3(C7 H8) | C86 H138 Mg2 N4 Na2 O2,<br>3(C7 H8) |
| Sum formula            | C107 H162 Mg2 N4 Na2 O2             | C107 H162 Mg2 N4 Na2 O2             |
| Mr                     | 1631.01                             | 1631.00                             |
| Dx, g cm <sup>-3</sup> | 1.110                               | 1.110                               |
| Z                      | 1                                   | 1                                   |
| Mu (mm <sup>-1</sup> ) | 0.677                               | 0.677                               |
| F000                   | 894.0                               | 894.0                               |
| F000'                  | 896.62                              |                                     |
| h,k,lmax               | 15,15,23                            | 15,15,23                            |
| Nref                   | 9693                                | 9409                                |
| Tmin,Tmax              | 0.854,0.936                         | 0.713,1.000                         |
| Tmin'                  | 0.825                               |                                     |

Correction method= # Reported T Limits: Tmin=0.713 Tmax=1.000  
AbsCorr = GAUSSIAN

Data completeness= 0.971      Theta(max)= 72.668

R(reflections)= 0.0473( 8401)

wR2(reflections)=  
0.1335( 9409)

S = 1.034

Npar= 626

---

The following ALERTS were generated. Each ALERT has the format

**test-name\_ALERT\_alert-type\_alert-level.**

Click on the hyperlinks for more details of the test.

---



### Alert level C

|                   |                                         |           |           |                   |           |       |        |
|-------------------|-----------------------------------------|-----------|-----------|-------------------|-----------|-------|--------|
| PLAT220_ALERT_2_C | NonSolvent                              | Resd 1    | C         | Ueq(max)/Ueq(min) | Range     | 3.1   | Ratio  |
| PLAT260_ALERT_2_C | Large Average Ueq of Residue Including  |           |           | C44               |           | 0.110 | Check  |
| PLAT911_ALERT_3_C | Missing FCF Refl Between Thmin & STh/L= |           |           | 0.600             |           | 41    | Report |
|                   | 13 11 0, -12-12                         | 1, -10-13 | 2, -11-12 | 2, -12-11         | 2, -10-13 | 3,    |        |
|                   | -11-12 3, -12-11                        | 3, -11-11 | 3, -11-11 | 4, 12 -2          | 4, 13 0   | 4,    |        |
|                   | 14 10 4, 12 -2                          | 5, 13 0   | 5, 14 10  | 5, 11 -3          | 6, 11 -2  | 6,    |        |
|                   | 14 10 6, 14 10                          | 7, 14 9   | 8, 14 9   | 9, 14 9           | 10, 5 14  | 10,   |        |
|                   | 13 8 11, 14 8                           | 11, 13 9  | 11, 13 10 | 11, 13 11         | 11, 6 14  | 11,   |        |
|                   | 13 8 12, 13 9                           | 12, 13 10 | 12, 13 8  | 13, 13 9          | 13, 12 10 | 13,   |        |
|                   | 12 11 13, 13 7                          | 14, 13 8  | 14, 12 10 | 14, -1 -1         | 21,       |       |        |

---

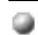

### Alert level G

|                   |                                                  |                                 |                    |   |  |        |        |
|-------------------|--------------------------------------------------|---------------------------------|--------------------|---|--|--------|--------|
| PLAT002_ALERT_2_G | Number of Distance or Angle Restraints on AtSite |                                 |                    |   |  | 9      | Note   |
| PLAT003_ALERT_2_G | Number of Uiso or U(i,j) Restrained non-H Atoms  |                                 |                    |   |  | 21     | Report |
| PLAT176_ALERT_4_G | The CIF-Embedded .res File Contains SADI Records |                                 |                    |   |  | 3      | Report |
| PLAT178_ALERT_4_G | The CIF-Embedded .res File Contains SIMU Records |                                 |                    |   |  | 2      | Report |
| PLAT187_ALERT_4_G | The CIF-Embedded .res File Contains RIGU Records |                                 |                    |   |  | 2      | Report |
| PLAT188_ALERT_3_G | A Non-default SIMU Restraint Value has been used |                                 |                    |   |  | 0.0200 | Report |
| PLAT188_ALERT_3_G | A Non-default SIMU Restraint Value has been used |                                 |                    |   |  | 0.0200 | Report |
| PLAT190_ALERT_3_G | A Non-default RIGU Restraint Value for First Par |                                 |                    |   |  | 0.0020 | Report |
| PLAT190_ALERT_3_G | A Non-default RIGU Restraint Value for SecondPar |                                 |                    |   |  | 0.0020 | Report |
| PLAT191_ALERT_3_G | A Non-default SADI Restraint Value has been used |                                 |                    |   |  | 0.0100 | Report |
| PLAT231_ALERT_4_G | Hirshfeld Test (Solvent)                         | C53                             | --C54              | . |  | 6.3    | s.u.   |
| PLAT300_ALERT_4_G | Atom Site Occupancy of C44                       |                                 | Constrained at     |   |  | 0.5    | Check  |
| PLAT300_ALERT_4_G | Atom Site Occupancy of C45                       |                                 | Constrained at     |   |  | 0.5    | Check  |
| PLAT300_ALERT_4_G | Atom Site Occupancy of C46                       |                                 | Constrained at     |   |  | 0.5    | Check  |
| PLAT300_ALERT_4_G | Atom Site Occupancy of C47                       |                                 | Constrained at     |   |  | 0.5    | Check  |
| PLAT300_ALERT_4_G | Atom Site Occupancy of C48                       |                                 | Constrained at     |   |  | 0.5    | Check  |
| PLAT300_ALERT_4_G | Atom Site Occupancy of C49                       |                                 | Constrained at     |   |  | 0.5    | Check  |
| PLAT300_ALERT_4_G | Atom Site Occupancy of C50                       |                                 | Constrained at     |   |  | 0.5    | Check  |
| PLAT300_ALERT_4_G | Atom Site Occupancy of H45                       |                                 | Constrained at     |   |  | 0.5    | Check  |
| PLAT300_ALERT_4_G | Atom Site Occupancy of H46                       |                                 | Constrained at     |   |  | 0.5    | Check  |
| PLAT300_ALERT_4_G | Atom Site Occupancy of H47                       |                                 | Constrained at     |   |  | 0.5    | Check  |
| PLAT300_ALERT_4_G | Atom Site Occupancy of H48                       |                                 | Constrained at     |   |  | 0.5    | Check  |
| PLAT300_ALERT_4_G | Atom Site Occupancy of H49                       |                                 | Constrained at     |   |  | 0.5    | Check  |
| PLAT300_ALERT_4_G | Atom Site Occupancy of H50A                      |                                 | Constrained at     |   |  | 0.5    | Check  |
| PLAT300_ALERT_4_G | Atom Site Occupancy of H50B                      |                                 | Constrained at     |   |  | 0.5    | Check  |
| PLAT300_ALERT_4_G | Atom Site Occupancy of H50C                      |                                 | Constrained at     |   |  | 0.5    | Check  |
| PLAT302_ALERT_4_G | Anion/Solvent/Minor-Residue Disorder (Resd       | 2)                              |                    |   |  | 100%   | Note   |
| PLAT302_ALERT_4_G | Anion/Solvent/Minor-Residue Disorder (Resd       | 3)                              |                    |   |  | 100%   | Note   |
| PLAT302_ALERT_4_G | Anion/Solvent/Minor-Residue Disorder (Resd       | 4)                              |                    |   |  | 100%   | Note   |
| PLAT303_ALERT_2_G | Full Occupancy Atom H1                           |                                 | with # Connections |   |  | 2.00   | Check  |
| PLAT303_ALERT_2_G | Full Occupancy Atom H20A                         |                                 | with # Connections |   |  | 2.00   | Check  |
| PLAT303_ALERT_2_G | Full Occupancy Atom H20B                         |                                 | with # Connections |   |  | 2.00   | Check  |
| PLAT304_ALERT_4_G | Non-Integer Number of Atoms in .....             | (Resd                           | 2)                 |   |  | 7.50   | Check  |
| PLAT304_ALERT_4_G | Non-Integer Number of Atoms in .....             | (Resd                           | 3)                 |   |  | 11.55  | Check  |
| PLAT304_ALERT_4_G | Non-Integer Number of Atoms in .....             | (Resd                           | 4)                 |   |  | 3.45   | Check  |
| PLAT343_ALERT_2_G | Unusual                                          | Angle Range in Main Residue for |                    |   |  | C20    | Check  |
| PLAT367_ALERT_2_G | Long? C(sp?) - C(sp?) Bond                       | C19                             | - C20              | . |  | 1.55   | Ang.   |

|                   |                                                  |       |                 |       |                   |
|-------------------|--------------------------------------------------|-------|-----------------|-------|-------------------|
| PLAT413_ALERT_2_G | Short Inter XH3 .. XHn                           | H7C   | ..H57D          | .     | 1.84 Ang.         |
|                   |                                                  |       | -x,1-y,1-z =    | 2_566 | Check             |
| PLAT413_ALERT_2_G | Short Inter XH3 .. XHn                           | H9A   | ..H57D          | .     | 2.03 Ang.         |
|                   |                                                  |       | -x,1-y,1-z =    | 2_566 | Check             |
| PLAT432_ALERT_2_G | Short Inter X...Y Contact                        | C7    | ..C57A          | .     | 3.19 Ang.         |
|                   |                                                  |       | -x,1-y,1-z =    | 2_566 | Check             |
| PLAT432_ALERT_2_G | Short Inter X...Y Contact                        | C9    | ..C57A          | .     | 3.18 Ang.         |
|                   |                                                  |       | -x,1-y,1-z =    | 2_566 | Check             |
| PLAT779_ALERT_4_G | Suspect or Irrelevant (Bond) Angle(s) in CIF ... |       |                 |       | 44.29 Deg.        |
|                   | N1 -C12 -MG1                                     | 1_555 | 1_555           | 1_555 | ..... # 101 Check |
| PLAT789_ALERT_4_G | Atoms with Negative _atom_site_disorder_group #  |       |                 |       | 15 Check          |
| PLAT822_ALERT_4_G | CIF-embedded .res Contains Negative PART Numbers |       |                 |       | 1 Check           |
| PLAT860_ALERT_3_G | Number of Least-Squares Restraints .....         |       |                 |       | 651 Note          |
| PLAT910_ALERT_3_G | Missing # of FCF Reflection(s) Below Theta(Min). |       |                 |       | 1 Note            |
|                   | 0 0 1,                                           |       |                 |       |                   |
| PLAT912_ALERT_4_G | Missing # of FCF Reflections Above STh/L=        | 0.600 |                 |       | 241 Note          |
| PLAT941_ALERT_3_G | Average HKL Measurement Multiplicity .....       |       |                 |       | 2.9 Low           |
| PLAT969_ALERT_5_G | The 'Henn et al.' R-Factor-gap value .....       |       |                 |       | 3.632 Note        |
|                   | Predicted wR2: Based on SigI**2                  | 3.66  | or SHELX Weight | 12.92 |                   |
| PLAT978_ALERT_2_G | Number C-C Bonds with Positive Residual Density. |       |                 |       | 12 Info           |

---

0 **ALERT level A** = Most likely a serious problem - resolve or explain  
 0 **ALERT level B** = A potentially serious problem, consider carefully  
 3 **ALERT level C** = Check. Ensure it is not caused by an omission or oversight  
 50 **ALERT level G** = General information/check it is not something unexpected

0 ALERT type 1 CIF construction/syntax error, inconsistent or missing data  
 14 ALERT type 2 Indicator that the structure model may be wrong or deficient  
 9 ALERT type 3 Indicator that the structure quality may be low  
 29 ALERT type 4 Improvement, methodology, query or suggestion  
 1 ALERT type 5 Informative message, check

---



---

It is advisable to attempt to resolve as many as possible of the alerts in all categories. Often the minor alerts point to easily fixed oversights, errors and omissions in your CIF or refinement strategy, so attention to these fine details can be worthwhile. In order to resolve some of the more serious problems it may be necessary to carry out additional measurements or structure refinements. However, the purpose of your study may justify the reported deviations and the more serious of these should normally be commented upon in the discussion or experimental section of a paper or in the "special\_details" fields of the CIF. checkCIF was carefully designed to identify outliers and unusual parameters, but every test has its limitations and alerts that are not important in a particular case may appear. Conversely, the absence of alerts does not guarantee there are no aspects of the results needing attention. It is up to the individual to critically assess their own results and, if necessary, seek expert advice.

### **Publication of your CIF in IUCr journals**

A basic structural check has been run on your CIF. These basic checks will be run on all CIFs submitted for publication in IUCr journals (*Acta Crystallographica*, *Journal of Applied Crystallography*, *Journal of Synchrotron Radiation*); however, if you intend to submit to *Acta Crystallographica Section C* or *E* or *IUCrData*, you should make sure that full publication checks are run on the final version of your CIF prior to submission.

### **Publication of your CIF in other journals**

Please refer to the *Notes for Authors* of the relevant journal for any special instructions relating to CIF submission.

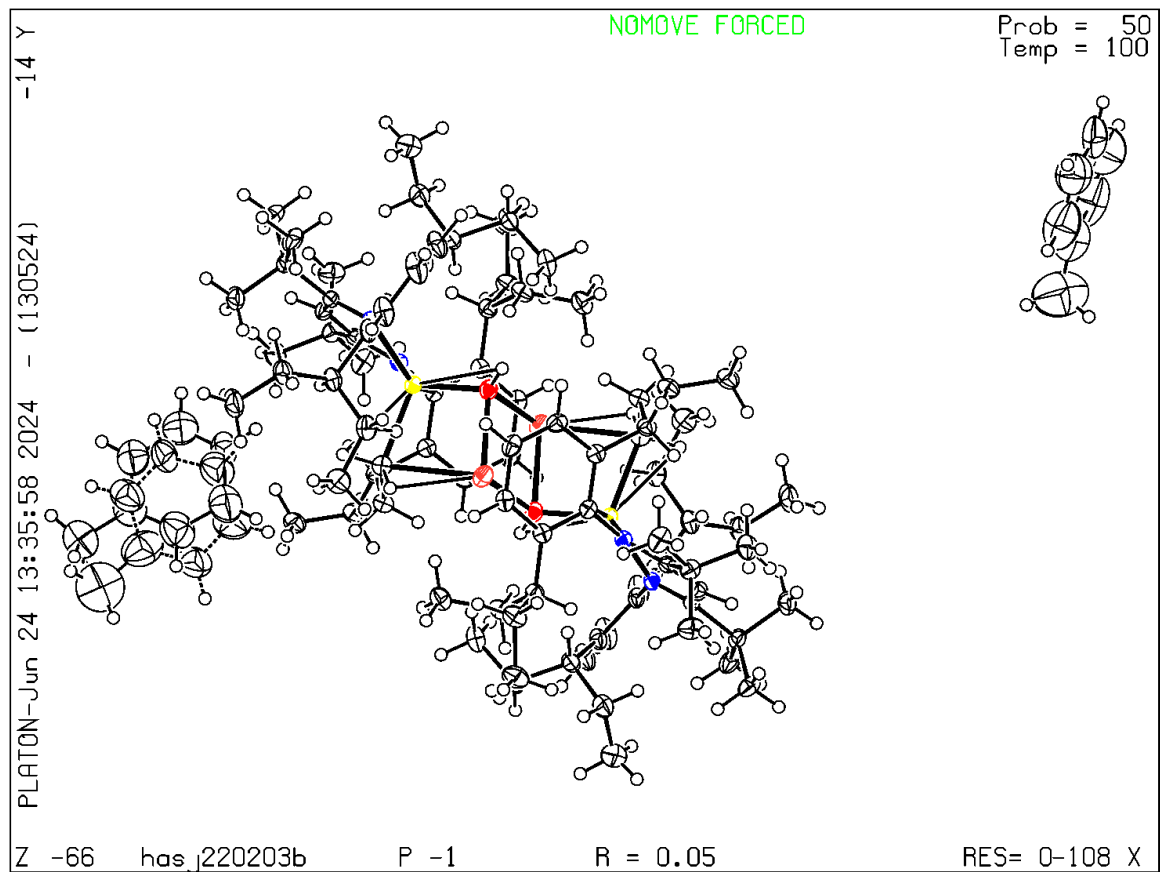

## checkCIF/PLATON report

Structure factors have been supplied for datablock(s) hasj231016a

THIS REPORT IS FOR GUIDANCE ONLY. IF USED AS PART OF A REVIEW PROCEDURE FOR PUBLICATION, IT SHOULD NOT REPLACE THE EXPERTISE OF AN EXPERIENCED CRYSTALLOGRAPHIC REFEREE.

No syntax errors found.      CIF dictionary      Interpreting this report

### Datablock: hasj231016a

---

Bond precision:      C-C = 0.0029 Å

Wavelength=1.54184

Cell:                      a=16.1046(3)                      b=19.7957(3)                      c=31.4472(4)  
                              alpha=77.931(1)                      beta=86.206(1)                      gamma=81.731(1)  
Temperature:              100 K

|                        | Calculated                | Reported                  |
|------------------------|---------------------------|---------------------------|
| Volume                 | 9695.2(3)                 | 9695.2(3)                 |
| Space group            | P -1                      | P -1                      |
| Hall group             | -P 1                      | -P 1                      |
| Moiety formula         | C55 H105 Mg N4 Na3 O2 Si4 | C55 H105 Mg N4 Na3 O2 Si4 |
| Sum formula            | C55 H105 Mg N4 Na3 O2 Si4 | C55 H105 Mg N4 Na3 O2 Si4 |
| Mr                     | 1060.07                   | 1060.06                   |
| Dx, g cm <sup>-3</sup> | 1.089                     | 1.089                     |
| Z                      | 6                         | 6                         |
| Mu (mm <sup>-1</sup> ) | 1.437                     | 1.437                     |
| F000                   | 3480.0                    | 3480.0                    |
| F000'                  | 3496.20                   |                           |
| h,k,lmax               | 19,24,38                  | 19,24,38                  |
| Nref                   | 38466                     | 37195                     |
| Tmin,Tmax              | 0.750,0.885               | 0.333,1.000               |
| Tmin'                  | 0.588                     |                           |

Correction method= # Reported T Limits: Tmin=0.333 Tmax=1.000  
AbsCorr = GAUSSIAN

Data completeness= 0.967

Theta(max)= 72.515

R(reflections)= 0.0412( 31634)

wR2(reflections)=  
0.1045( 37195)

S = 1.042

Npar= 1942

---

The following ALERTS were generated. Each ALERT has the format

**test-name\_ALERT\_alert-type\_alert-level.**

Click on the hyperlinks for more details of the test.

---

### Alert level C

PLAT220\_ALERT\_2\_C NonSolvent Resd 1 C Ueq(max)/Ueq(min) Range 3.2 Ratio  
PLAT220\_ALERT\_2\_C NonSolvent Resd 3 C Ueq(max)/Ueq(min) Range 3.6 Ratio  
PLAT222\_ALERT\_3\_C NonSolvent Resd 3 H Uiso(max)/Uiso(min) Range 4.2 Ratio  
PLAT413\_ALERT\_2\_C Short Inter XH3 .. XHn H ..H . 2.13 Ang.  
1-x,1-y,1-z = 2\_666 Check  
PLAT906\_ALERT\_3\_C Large K Value in the Analysis of Variance ..... 2.920 Check  
PLAT911\_ALERT\_3\_C Missing FCF Refl Between Thmin & STh/L= 0.600 153 Report  
-17 7 0, 2 23 0, 3 23 0, -4-23 1, -3-23 1, -2-23 1,  
12-13 1, 9-12 1, 7 11 1, 4 12 1, 5 12 1, 1 13 1,  
3 13 1, 2 23 1, 3 23 1, 9-12 2, 17 -4 2, -17 7 2,  
8 10 2, 6 11 2, 7 11 2, 5 12 2, 6 12 2, 0 13 2,  
2 23 2, 3 23 2, 1 2 3, 18 4 3, 9 9 3, 8 10 3,  
7 11 3, 6 12 3, 17 14 3, 2 23 3, 3 23 3, 1 3 4,  
19 6 4, -1 13 4, 17 14 4, 2 23 4, 3 23 4, -3-22 5,  
1 3 5, 2 3 5, 1 4 5, 2 23 5, 3 23 5, -4-22 6,  
-3-22 6, 16 -9 6, 2 -2 6, 2 3 6, 1 4 6, 2 4 6,  
1 5 6, -3 12 6, 16 16 6, 2 23 6, 3 23 6, 1 4 7,  
2 4 7, -3 12 7, 16 16 7, 15 17 7, 2 23 7, 3 23 7,  
-6-21 8, 10 4 8, 2 23 8, -3-21 9, 9 4 9, 10 4 9,  
-4 11 9, -3-21 10, 9 3 11, 9 2 12, 8 3 12, 9 3 12,  
12 12 12, 11 21 12, -1-20 13, 8 2 13, 11 12 13, -5 8 14,  
9 22 14, 0-19 15, 1-19 15, 12 -4 15, 8 1 15, 1-18 16,  
-10 17 16, -9 18 16, 1-18 17, 2-18 17, -5 5 17, -10 16 17,

### Alert level G

PLAT154\_ALERT\_1\_G The s.u.'s on the Cell Angles are Equal ..(Note) 0.001 Degree  
PLAT720\_ALERT\_4\_G Number of Unusual/Non-Standard Labels ..... 7 Note  
H1AA H1AB H1AC H1AD H1AE H1AF H1AG  
PLAT910\_ALERT\_3\_G Missing # of FCF Reflection(s) Below Theta(Min). 3 Note  
0 1 0, 0 0 1, 0 1 1,  
PLAT912\_ALERT\_4\_G Missing # of FCF Reflections Above STh/L= 0.600 1115 Note  
PLAT933\_ALERT\_2\_G Number of HKL-OMIT Records in Embedded .res File 7 Note  
-17 7 0, -17 7 2, 2 -2 6, 12 -2 28, 17 -4 2, 18 4 3,  
19 6 4,  
PLAT941\_ALERT\_3\_G Average HKL Measurement Multiplicity ..... 1.8 Low  
PLAT969\_ALERT\_5\_G The 'Henn et al.' R-Factor-gap value ..... 2.028 Note  
Predicted wR2: Based on SigI\*\*2 5.16 or SHELX Weight 10.03  
PLAT978\_ALERT\_2\_G Number C-C Bonds with Positive Residual Density. 4 Info

---

0 **ALERT level A** = Most likely a serious problem - resolve or explain  
0 **ALERT level B** = A potentially serious problem, consider carefully  
6 **ALERT level C** = Check. Ensure it is not caused by an omission or oversight  
8 **ALERT level G** = General information/check it is not something unexpected

1 ALERT type 1 CIF construction/syntax error, inconsistent or missing data



5 ALERT type 2 Indicator that the structure model may be wrong or deficient  
5 ALERT type 3 Indicator that the structure quality may be low  
2 ALERT type 4 Improvement, methodology, query or suggestion  
1 ALERT type 5 Informative message, check

---

---

It is advisable to attempt to resolve as many as possible of the alerts in all categories. Often the minor alerts point to easily fixed oversights, errors and omissions in your CIF or refinement strategy, so attention to these fine details can be worthwhile. In order to resolve some of the more serious problems it may be necessary to carry out additional measurements or structure refinements. However, the purpose of your study may justify the reported deviations and the more serious of these should normally be commented upon in the discussion or experimental section of a paper or in the "special\_details" fields of the CIF. checkCIF was carefully designed to identify outliers and unusual parameters, but every test has its limitations and alerts that are not important in a particular case may appear. Conversely, the absence of alerts does not guarantee there are no aspects of the results needing attention. It is up to the individual to critically assess their own results and, if necessary, seek expert advice.

### **Publication of your CIF in IUCr journals**

A basic structural check has been run on your CIF. These basic checks will be run on all CIFs submitted for publication in IUCr journals (*Acta Crystallographica*, *Journal of Applied Crystallography*, *Journal of Synchrotron Radiation*); however, if you intend to submit to *Acta Crystallographica Section C* or *E* or *IUCrData*, you should make sure that full publication checks are run on the final version of your CIF prior to submission.

### **Publication of your CIF in other journals**

Please refer to the *Notes for Authors* of the relevant journal for any special instructions relating to CIF submission.

---

**PLATON version of 13/05/2024; check.def file version of 04/05/2024**

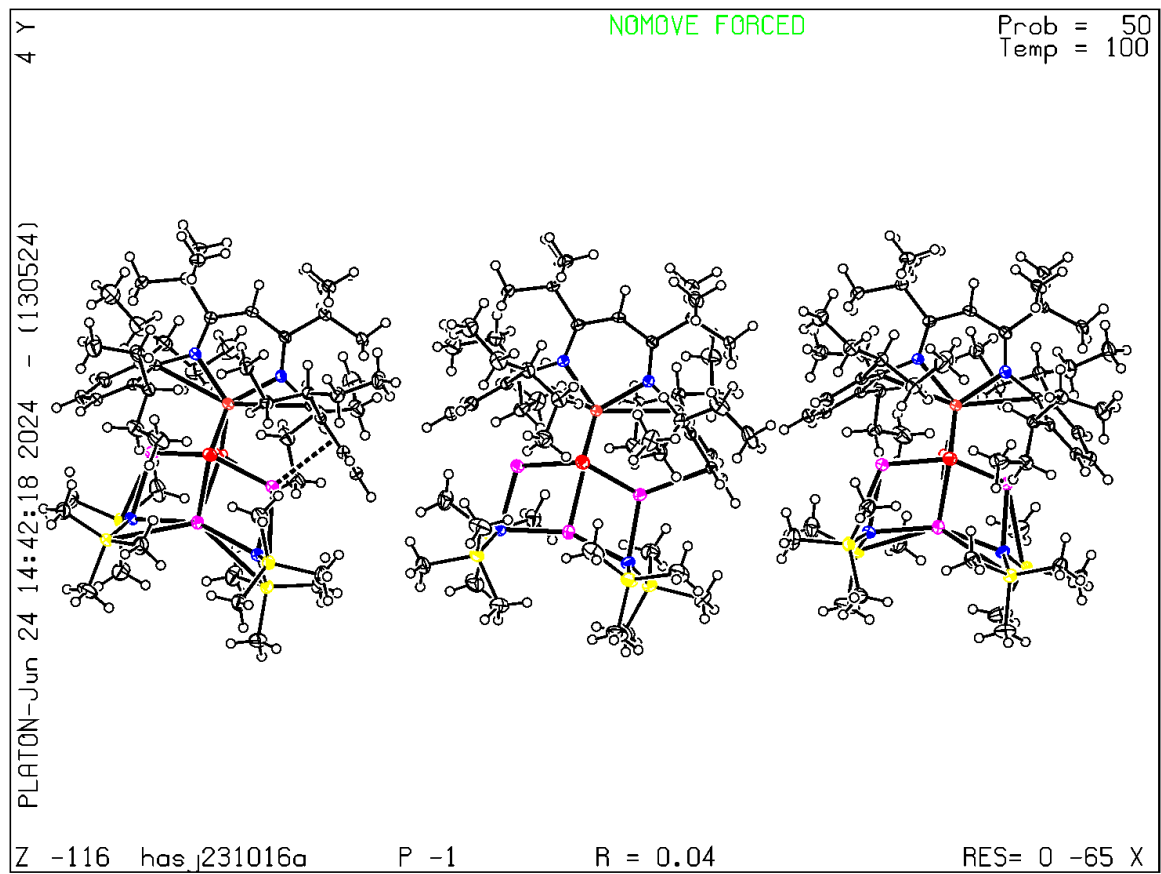

```
R(reflections)= 0.0387( 12385)      wR2(reflections)=
S = 1.017                          0.1073( 14412)
Npar= 848
```

---

The following ALERTS were generated. Each ALERT has the format

**test-name\_ALERT\_alert-type\_alert-level.**

Click on the hyperlinks for more details of the test.

---

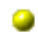

### Alert level C

|                   |                                               |       |           |
|-------------------|-----------------------------------------------|-------|-----------|
| PLAT112_ALERT_2_C | ADDSYM Detects New (Pseudo) Symm. Elem        | C     | 95 %Fit   |
| PLAT220_ALERT_2_C | NonSolvent Resd 1 C Ueq(max)/Ueq(min) Range   |       | 3.8 Ratio |
| PLAT222_ALERT_3_C | NonSolvent Resd 1 H Uiso(max)/Uiso(min) Range |       | 4.8 Ratio |
| PLAT230_ALERT_2_C | Hirshfeld Test Diff for Si2 --C49             | .     | 5.3 s.u.  |
| PLAT230_ALERT_2_C | Hirshfeld Test Diff for Si3 --C51             | .     | 5.6 s.u.  |
| PLAT242_ALERT_2_C | Low 'MainMol' Ueq as Compared to Neighbors of |       | Si3 Check |
| PLAT911_ALERT_3_C | Missing FCF Refl Between Thmin & STh/L=       | 0.600 | 70 Report |

---

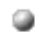

### Alert level G

|                   |                                                  |       |               |
|-------------------|--------------------------------------------------|-------|---------------|
| PLAT002_ALERT_2_G | Number of Distance or Angle Restraints on AtSite |       | 21 Note       |
| PLAT003_ALERT_2_G | Number of Uiso or Uij Restrained non-H Atoms ... |       | 19 Report     |
| PLAT143_ALERT_4_G | s.u. on c - Axis Small or Missing .....          |       | 0.00018 Ang.  |
| PLAT176_ALERT_4_G | The CIF-Embedded .res File Contains SADI Records |       | 5 Report      |
| PLAT178_ALERT_4_G | The CIF-Embedded .res File Contains SIMU Records |       | 3 Report      |
| PLAT187_ALERT_4_G | The CIF-Embedded .res File Contains RIGU Records |       | 1 Report      |
| PLAT188_ALERT_3_G | A Non-default SIMU Restraint Value has been used |       | 0.0200 Report |
| PLAT188_ALERT_3_G | A Non-default SIMU Restraint Value has been used |       | 0.0200 Report |
| PLAT188_ALERT_3_G | A Non-default SIMU Restraint Value has been used |       | 0.0100 Report |
| PLAT190_ALERT_3_G | A Non-default RIGU Restraint Value for First Par |       | 0.0030 Report |
| PLAT190_ALERT_3_G | A Non-default RIGU Restraint Value for SecondPar |       | 0.0030 Report |
| PLAT232_ALERT_2_G | Hirshfeld Test Diff (M-X) Mg1 --O2               | .     | 5.2 s.u.      |
| PLAT301_ALERT_3_G | Main Residue Disorder .....(Resd 1 )             |       | 11% Note      |
| PLAT410_ALERT_2_G | Short Intra H...H Contact H16 ..H26B             | .     | 2.10 Ang.     |
|                   | x,y,z =                                          |       | 1_555 Check   |
| PLAT410_ALERT_2_G | Short Intra H...H Contact H32 ..H40D             | .     | 2.04 Ang.     |
|                   | x,y,z =                                          |       | 1_555 Check   |
| PLAT412_ALERT_2_G | Short Intra XH3 .. XHn H16 ..H27D                | .     | 2.09 Ang.     |
|                   | x,y,z =                                          |       | 1_555 Check   |
| PLAT412_ALERT_2_G | Short Intra XH3 .. XHn H32 ..H41C                | .     | 2.07 Ang.     |
|                   | x,y,z =                                          |       | 1_555 Check   |
| PLAT413_ALERT_2_G | Short Inter XH3 .. XHn H50B ..H26D               | .     | 2.11 Ang.     |
|                   | -x,1/2+y,1/2-z =                                 |       | 2_555 Check   |
| PLAT432_ALERT_2_G | Short Inter X...Y Contact C30 ..C41A             | .     | 3.07 Ang.     |
|                   | 1-x,1-y,1-z =                                    |       | 3_666 Check   |
| PLAT432_ALERT_2_G | Short Inter X...Y Contact C31 ..C41A             | .     | 2.92 Ang.     |
|                   | 1-x,1-y,1-z =                                    |       | 3_666 Check   |
| PLAT860_ALERT_3_G | Number of Least-Squares Restraints .....         |       | 597 Note      |
| PLAT910_ALERT_3_G | Missing # of FCF Reflection(s) Below Theta(Min). |       | 1 Note        |
| PLAT912_ALERT_4_G | Missing # of FCF Reflections Above STh/L=        | 0.600 | 424 Note      |
| PLAT941_ALERT_3_G | Average HKL Measurement Multiplicity .....       |       | 1.8 Low       |
| PLAT978_ALERT_2_G | Number C-C Bonds with Positive Residual Density. |       | 10 Info       |

---

0 **ALERT level A** = Most likely a serious problem - resolve or explain

0 **ALERT level B** = A potentially serious problem, consider carefully

7 **ALERT level C** = Check. Ensure it is not caused by an omission or oversight

25 **ALERT level G** = General information/check it is not something unexpected

0 ALERT type 1 CIF construction/syntax error, inconsistent or missing data

16 ALERT type 2 Indicator that the structure model may be wrong or deficient  
11 ALERT type 3 Indicator that the structure quality may be low  
5 ALERT type 4 Improvement, methodology, query or suggestion  
0 ALERT type 5 Informative message, check

---

It is advisable to attempt to resolve as many as possible of the alerts in all categories. Often the minor alerts point to easily fixed oversights, errors and omissions in your CIF or refinement strategy, so attention to these fine details can be worthwhile. In order to resolve some of the more serious problems it may be necessary to carry out additional measurements or structure refinements. However, the purpose of your study may justify the reported deviations and the more serious of these should normally be commented upon in the discussion or experimental section of a paper or in the "special\_details" fields of the CIF. checkCIF was carefully designed to identify outliers and unusual parameters, but every test has its limitations and alerts that are not important in a particular case may appear. Conversely, the absence of alerts does not guarantee there are no aspects of the results needing attention. It is up to the individual to critically assess their own results and, if necessary, seek expert advice.

### **Publication of your CIF in IUCr journals**

A basic structural check has been run on your CIF. These basic checks will be run on all CIFs submitted for publication in IUCr journals (*Acta Crystallographica*, *Journal of Applied Crystallography*, *Journal of Synchrotron Radiation*); however, if you intend to submit to *Acta Crystallographica Section C* or *E* or *IUCrData*, you should make sure that full publication checks are run on the final version of your CIF prior to submission.

### **Publication of your CIF in other journals**

Please refer to the *Notes for Authors* of the relevant journal for any special instructions relating to CIF submission.

---

**PLATON version of 28/11/2022; check.def file version of 28/11/2022**

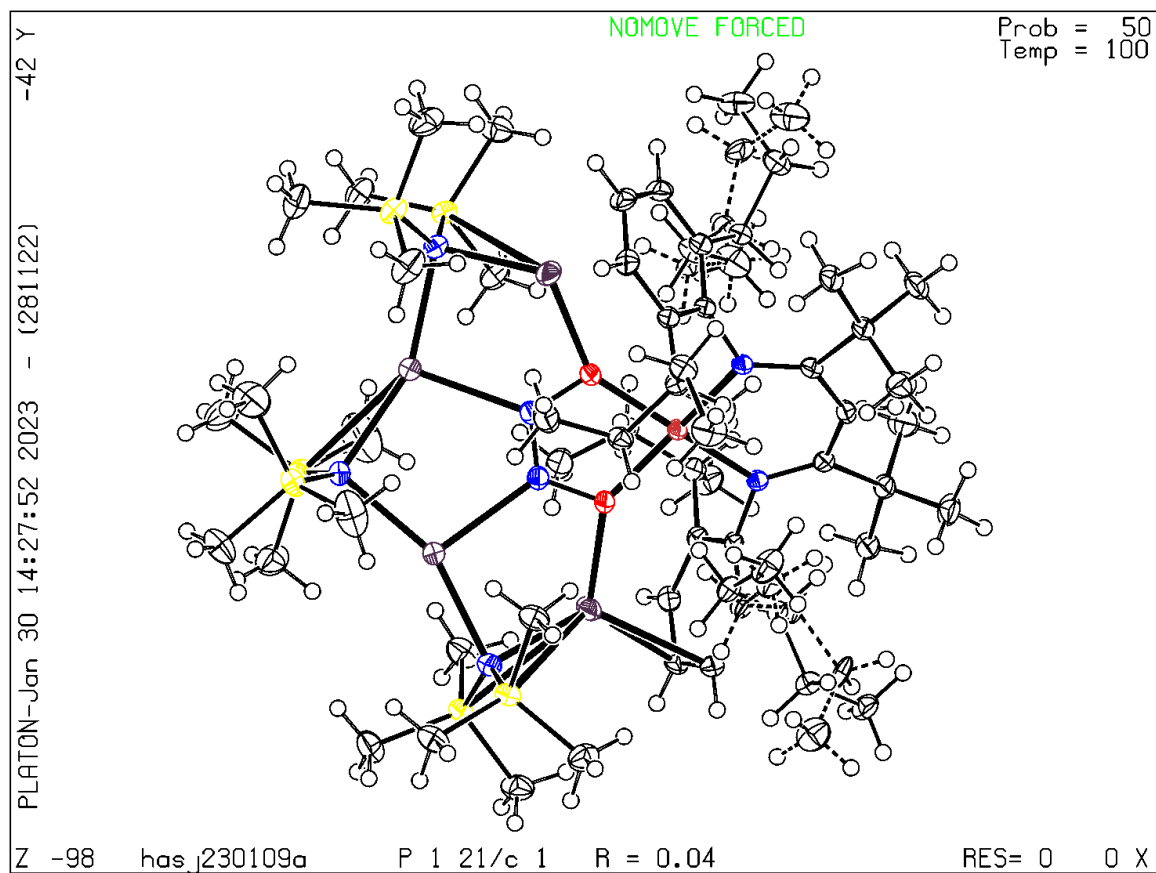

## checkCIF/PLATON report

Structure factors have been supplied for datablock(s) hasj240220a

THIS REPORT IS FOR GUIDANCE ONLY. IF USED AS PART OF A REVIEW PROCEDURE FOR PUBLICATION, IT SHOULD NOT REPLACE THE EXPERTISE OF AN EXPERIENCED CRYSTALLOGRAPHIC REFEREE.

No syntax errors found. CIF dictionary Interpreting this report

**Datablock: hasj240220a**

|                 |                |                    |              |
|-----------------|----------------|--------------------|--------------|
| Bond precision: | C-C = 0.0017 Å | Wavelength=1.54184 |              |
| Cell:           | a=10.3537(1)   | b=19.5644(2)       | c=21.7614(2) |
|                 | alpha=90       | beta=96.920(1)     | gamma=90     |
| Temperature:    | 100 K          |                    |              |

|                        | Calculated      | Reported        |
|------------------------|-----------------|-----------------|
| Volume                 | 4375.96(7)      | 4375.96(7)      |
| Space group            | P 21/n          | P 1 21/n 1      |
| Hall group             | -P 2yn          | -P 2yn          |
| Moiety formula         | C47 H77 N2 Na O | C47 H77 N2 Na O |
| Sum formula            | C47 H77 N2 Na O | C47 H77 N2 Na O |
| Mr                     | 709.10          | 709.09          |
| Dx, g cm <sup>-3</sup> | 1.076           | 1.076           |
| Z                      | 4               | 4               |
| Mu (mm <sup>-1</sup> ) | 0.554           | 0.554           |
| F000                   | 1568.0          | 1568.0          |
| F000'                  | 1572.15         |                 |
| h, k, lmax             | 12, 24, 26      | 12, 23, 26      |
| Nref                   | 8692            | 8426            |
| Tmin, Tmax             | 0.865, 0.903    | 0.582, 1.000    |
| Tmin'                  | 0.804           |                 |

```
Correction method= # Reported T Limits: Tmin=0.582 Tmax=1.000
AbsCorr = GAUSSIAN
```

Data completeness= 0.969                      Theta (max)= 72.578

|                               |                                 |
|-------------------------------|---------------------------------|
| R(reflections)= 0.0367( 7571) | wR2(reflections)= 0.0950( 8426) |
| S = 1.025                     | Npar= 520                       |

---

The following ALERTS were generated. Each ALERT has the format

**test-name\_ALERT\_alert-type\_alert-level.**

Click on the hyperlinks for more details of the test.

---



### Alert level C

|                   |                  |           |                |                   |          |           |        |
|-------------------|------------------|-----------|----------------|-------------------|----------|-----------|--------|
| PLAT220_ALERT_2_C | NonSolvent       | Resd 1    | C              | Ueq(max)/Ueq(min) | Range    | 3.3       | Ratio  |
| PLAT911_ALERT_3_C | Missing FCF Refl | Between   | Thmin & STh/L= | 0.600             |          | 20        | Report |
|                   | 0 12 0,          | 1 13 0,   | 1 0 1,         | 1 12 1,           | 0 13 1,  | 1 13 1,   |        |
|                   | 2 0 2,           | 1 12 2,   | 0 13 2,        | 2 23 2,           | 2 12 3,  | -6 0 6,   |        |
|                   | -6 1 6,          | 2 22 7,   | -5 0 11,       | -4 0 12,          | 3 18 14, | -10 0 16, |        |
|                   | -6 0 22,         | -3 12 22, |                |                   |          |           |        |

---

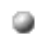

### Alert level G

|                   |                                                      |         |        |
|-------------------|------------------------------------------------------|---------|--------|
| PLAT002_ALERT_2_G | Number of Distance or Angle Restraints on AtSite     | 11      | Note   |
| PLAT003_ALERT_2_G | Number of Uiso or U(i,j) Restrained non-H Atoms      | 10      | Report |
| PLAT143_ALERT_4_G | s.u. on c - Axis Small or Missing .....              | 0.00020 | Ang.   |
| PLAT176_ALERT_4_G | The CIF-Embedded .res File Contains SADI Records     | 4       | Report |
| PLAT178_ALERT_4_G | The CIF-Embedded .res File Contains SIMU Records     | 1       | Report |
| PLAT187_ALERT_4_G | The CIF-Embedded .res File Contains RIGU Records     | 1       | Report |
| PLAT301_ALERT_3_G | Main Residue Disorder .....(Resd 1)                  | 10%     | Note   |
| PLAT860_ALERT_3_G | Number of Least-Squares Restraints .....             | 224     | Note   |
| PLAT910_ALERT_3_G | Missing # of FCF Reflection(s) Below Theta(Min).     | 1       | Note   |
|                   | 0 1 1,                                               |         |        |
| PLAT912_ALERT_4_G | Missing # of FCF Reflections Above STh/L= 0.600      | 235     | Note   |
| PLAT941_ALERT_3_G | Average HKL Measurement Multiplicity .....           | 1.9     | Low    |
| PLAT969_ALERT_5_G | The 'Henn et al.' R-Factor-gap value .....           | 2.667   | Note   |
|                   | Predicted wR2: Based on SigI**2 3.56 or SHELX Weight | 9.27    |        |
| PLAT978_ALERT_2_G | Number C-C Bonds with Positive Residual Density.     | 19      | Info   |

---

- 0 **ALERT level A** = Most likely a serious problem - resolve or explain  
0 **ALERT level B** = A potentially serious problem, consider carefully  
2 **ALERT level C** = Check. Ensure it is not caused by an omission or oversight  
13 **ALERT level G** = General information/check it is not something unexpected
- 0 ALERT type 1 CIF construction/syntax error, inconsistent or missing data  
4 ALERT type 2 Indicator that the structure model may be wrong or deficient  
5 ALERT type 3 Indicator that the structure quality may be low  
5 ALERT type 4 Improvement, methodology, query or suggestion  
1 ALERT type 5 Informative message, check
- 
-



It is advisable to attempt to resolve as many as possible of the alerts in all categories. Often the minor alerts point to easily fixed oversights, errors and omissions in your CIF or refinement strategy, so attention to these fine details can be worthwhile. In order to resolve some of the more serious problems it may be necessary to carry out additional measurements or structure refinements. However, the purpose of your study may justify the reported deviations and the more serious of these should normally be commented upon in the discussion or experimental section of a paper or in the "special\_details" fields of the CIF. checkCIF was carefully designed to identify outliers and unusual parameters, but every test has its limitations and alerts that are not important in a particular case may appear. Conversely, the absence of alerts does not guarantee there are no aspects of the results needing attention. It is up to the individual to critically assess their own results and, if necessary, seek expert advice.

### **Publication of your CIF in IUCr journals**

A basic structural check has been run on your CIF. These basic checks will be run on all CIFs submitted for publication in IUCr journals (*Acta Crystallographica*, *Journal of Applied Crystallography*, *Journal of Synchrotron Radiation*); however, if you intend to submit to *Acta Crystallographica Section C* or *E* or *IUCrData*, you should make sure that full publication checks are run on the final version of your CIF prior to submission.

### **Publication of your CIF in other journals**

Please refer to the *Notes for Authors* of the relevant journal for any special instructions relating to CIF submission.

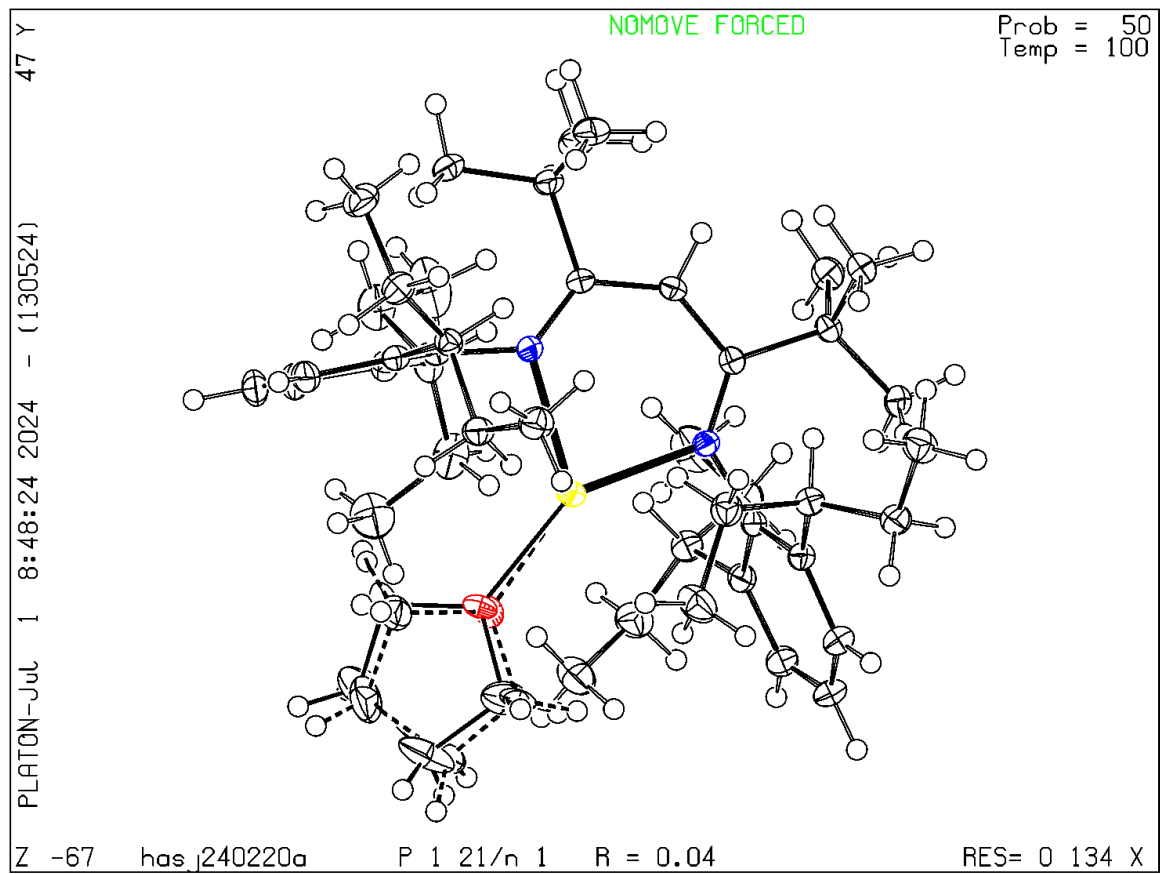

## checkCIF/PLATON report

Structure factors have been supplied for datablock(s) hasj211112a

THIS REPORT IS FOR GUIDANCE ONLY. IF USED AS PART OF A REVIEW PROCEDURE FOR PUBLICATION, IT SHOULD NOT REPLACE THE EXPERTISE OF AN EXPERIENCED CRYSTALLOGRAPHIC REFEREE.

No syntax errors found.      CIF dictionary      Interpreting this report

### Datablock: hasj211112a

---

Bond precision:      C-C = 0.0025 A

Wavelength=1.54184

Cell:                      a=11.4384(3)                      b=15.0170(3)                      c=36.1820(7)  
                              alpha=82.6283(16)                      beta=85.6640(17)                      gamma=70.183(2)  
Temperature:      100 K

|                        | Calculated                                 | Reported                                         |
|------------------------|--------------------------------------------|--------------------------------------------------|
| Volume                 | 5795.2(2)                                  | 5795.2(2)                                        |
| Space group            | P -1                                       | P -1                                             |
| Hall group             | -P 1                                       | -P 1                                             |
| Moiety formula         | 2(C55 H93 N2 Na O3), C6<br>H14, 0.5(C6 H6) | 1(C55 H93 N2 Na O3), 0.5(C6<br>H14), 0.25(C6 H6) |
| Sum formula            | C119 H203 N4 Na2 O6                        | C59.50 H101.50 N2 Na O3                          |
| Mr                     | 1831.83                                    | 915.91                                           |
| Dx, g cm <sup>-3</sup> | 1.050                                      | 1.050                                            |
| Z                      | 2                                          | 4                                                |
| Mu (mm <sup>-1</sup> ) | 0.539                                      | 0.539                                            |
| F000                   | 2030.0                                     | 2030.0                                           |
| F000'                  | 2035.40                                    |                                                  |
| h,k,lmax               | 14,18,44                                   | 14,18,44                                         |
| Nref                   | 23028                                      | 22211                                            |
| Tmin,Tmax              | 0.852,0.900                                | 0.431,1.000                                      |
| Tmin'                  | 0.810                                      |                                                  |

Correction method= # Reported T Limits: Tmin=0.431 Tmax=1.000  
AbsCorr = GAUSSIAN

Data completeness= 0.965

Theta(max)= 72.690

R(reflections)= 0.0546( 18996)

wR2(reflections)=  
0.1577( 22211)

S = 1.017

Npar= 1756

---

The following ALERTS were generated. Each ALERT has the format

**test-name\_ALERT\_alert-type\_alert-level.**

Click on the hyperlinks for more details of the test.

---

### Alert level C

|                   |                                                     |              |
|-------------------|-----------------------------------------------------|--------------|
| PLAT042_ALERT_1_C | Calc. and Reported MoietyFormula Strings Differ     | Please Check |
|                   | Calc: 2(C55 H93 N2 Na O3), C6 H14, 0.5(C6 H6)       |              |
|                   | Rep.: 1(C55 H93 N2 Na O3), 0.5(C6 H14), 0.25(C6 H6) |              |
| PLAT220_ALERT_2_C | NonSolvent Resd 1 C Ueq(max)/Ueq(min) Range         | 4.6 Ratio    |
| PLAT220_ALERT_2_C | NonSolvent Resd 2 C Ueq(max)/Ueq(min) Range         | 3.8 Ratio    |
| PLAT222_ALERT_3_C | NonSolvent Resd 1 H Uiso(max)/Uiso(min) Range       | 4.5 Ratio    |
| PLAT222_ALERT_3_C | NonSolvent Resd 2 H Uiso(max)/Uiso(min) Range       | 4.1 Ratio    |
| PLAT250_ALERT_2_C | Large U3/U1 Ratio for <U(i,j)> Tensor(Resd 4)       | 3.1 Note     |
| PLAT250_ALERT_2_C | Large U3/U1 Ratio for <U(i,j)> Tensor(Resd 5)       | 2.8 Note     |
| PLAT260_ALERT_2_C | Large Average Ueq of Residue Including C117         | 0.147 Check  |
| PLAT260_ALERT_2_C | Large Average Ueq of Residue Including C140         | 0.147 Check  |
| PLAT906_ALERT_3_C | Large K Value in the Analysis of Variance .....     | 2.943 Check  |
| PLAT911_ALERT_3_C | Missing FCF Refl Between Thmin & STh/L= 0.600       | 90 Report    |
|                   | 5 16 1, 7 7 2, 7 7 3, -6 -6 4, -1 0 5,              | 1 1 5,       |
|                   | 7 17 6, 6 5 7, 7 17 7, 2 2 8, 5 4 8,                | 6 5 8,       |
|                   | 7 17 8, 2-15 9, -13 -3 9, 5 4 9, 6 5 9,             | 7 17 9,      |
|                   | 6 6 10, 8 17 10, 7 2 11, 4 4 11, 5 5 11,            | 6 6 11,      |
|                   | 7 3 12, 6 7 12, 4 5 13, 5 6 13, 6 7 13,             | 6 1 14,      |
|                   | -10-13 15, 6 1 15, 5 7 15, -8 9 15, 6 1 16,         | -3 5 16,     |
|                   | -2 6 16, 13 8 16, 8 16 16, 8 16 17, -9-12 18,       | -7 10 18,    |
|                   | 8 16 18, -8 8 19, -7 9 19, 8 16 19, -8 8 20,        | -7 9 20,     |
|                   | 8 16 20, -7 9 21, 8 15 21, -7 9 22, -6 10 22,       | 8 15 22,     |
|                   | -6 10 23, 8 15 23, 8 15 24, -6 9 25, -5 10 25,      | -6 9 26,     |
|                   | -5 10 26, 7 15 26, -7-11 27, -5 10 27, -4-12 28,    | -6-11 28,    |
|                   | -4 10 28, -5-11 29, -4-11 29, -4-10 29, -3-10 29,   | -2 -9 29,    |
|                   | -4 10 29, -4-10 30, -3-10 30, -2 -9 30, -5 9 30,    | -4 10 30,    |
|                   | -3 10 31, -4 9 32, -3 10 32, -3 9 33, -3 10 33,     | -3 9 34,     |
|                   | -5 0 39, 4 4 41, 5 5 41, 4 3 42, 4 4 42,            | 4 5 42,      |

### Alert level G

|                   |                                                  |               |
|-------------------|--------------------------------------------------|---------------|
| PLAT002_ALERT_2_G | Number of Distance or Angle Restraints on AtSite | 92 Note       |
| PLAT003_ALERT_2_G | Number of Uiso or U(i,j) Restrained non-H Atoms  | 105 Report    |
| PLAT045_ALERT_1_G | Calculated and Reported Z Differ by a Factor ... | 0.500 Check   |
| PLAT176_ALERT_4_G | The CIF-Embedded .res File Contains SADI Records | 11 Report     |
| PLAT178_ALERT_4_G | The CIF-Embedded .res File Contains SIMU Records | 8 Report      |
| PLAT180_ALERT_4_G | Check Cell Rounding: # of Values Ending with 0 = | 3 Note        |
| PLAT187_ALERT_4_G | The CIF-Embedded .res File Contains RIGU Records | 1 Report      |
| PLAT188_ALERT_3_G | A Non-default SIMU Restraint Value has been used | 0.0300 Report |
| PLAT188_ALERT_3_G | A Non-default SIMU Restraint Value has been used | 0.0200 Report |
| PLAT188_ALERT_3_G | A Non-default SIMU Restraint Value has been used | 0.0200 Report |
| PLAT188_ALERT_3_G | A Non-default SIMU Restraint Value has been used | 0.0200 Report |
| PLAT188_ALERT_3_G | A Non-default SIMU Restraint Value has been used | 0.0200 Report |
| PLAT188_ALERT_3_G | A Non-default SIMU Restraint Value has been used | 0.0200 Report |
| PLAT188_ALERT_3_G | A Non-default SIMU Restraint Value has been used | 0.0100 Report |
| PLAT188_ALERT_3_G | A Non-default SIMU Restraint Value has been used | 0.0200 Report |
| PLAT190_ALERT_3_G | A Non-default RIGU Restraint Value for First Par | 0.0010 Report |
| PLAT190_ALERT_3_G | A Non-default RIGU Restraint Value for SecondPar | 0.0010 Report |
| PLAT230_ALERT_2_G | Hirshfeld Test Diff for O4 --C102 .              | 7.1 s.u.      |
| PLAT230_ALERT_2_G | Hirshfeld Test Diff for C81 --C82 .              | 6.5 s.u.      |

|                   |                                                            |       |               |       |            |
|-------------------|------------------------------------------------------------|-------|---------------|-------|------------|
| PLAT230_ALERT_2_G | Hirshfeld Test Diff for                                    | C107  | --C108        | .     | 6.0 s.u.   |
| PLAT231_ALERT_4_G | Hirshfeld Test (Solvent)                                   | C115  | --C116        | .     | 7.5 s.u.   |
| PLAT231_ALERT_4_G | Hirshfeld Test (Solvent)                                   | C115  | --C139        | .     | 5.0 s.u.   |
| PLAT301_ALERT_3_G | Main Residue Disorder .....                                | (Resd | 1)            |       | 77% Note   |
| PLAT302_ALERT_4_G | Anion/Solvent/Minor-Residue Disorder                       | (Resd | 3)            |       | 83% Note   |
| PLAT302_ALERT_4_G | Anion/Solvent/Minor-Residue Disorder                       | (Resd | 4)            |       | 100% Note  |
| PLAT302_ALERT_4_G | Anion/Solvent/Minor-Residue Disorder                       | (Resd | 5)            |       | 100% Note  |
| PLAT304_ALERT_4_G | Non-Integer Number of Atoms in .....                       | (Resd | 4)            |       | 3.34 Check |
| PLAT304_ALERT_4_G | Non-Integer Number of Atoms in .....                       | (Resd | 5)            |       | 2.66 Check |
| PLAT410_ALERT_2_G | Short Intra H...H Contact                                  | H71   | ..H81D        | .     | 2.02 Ang.  |
|                   |                                                            |       | x,y,z =       | 1_555 | Check      |
| PLAT412_ALERT_2_G | Short Intra XH3 .. XHn                                     | H61C  | ..H90C        | .     | 1.74 Ang.  |
|                   |                                                            |       | x,y,z =       | 1_555 | Check      |
| PLAT413_ALERT_2_G | Short Inter XH3 .. XHn                                     | H62B  | ..H141        | .     | 1.98 Ang.  |
|                   |                                                            |       | 1-x,2-y,2-z = | 2_677 | Check      |
| PLAT413_ALERT_2_G | Short Inter XH3 .. XHn                                     | H62B  | ..H142        | .     | 1.44 Ang.  |
|                   |                                                            |       | 1-x,2-y,2-z = | 2_677 | Check      |
| PLAT413_ALERT_2_G | Short Inter XH3 .. XHn                                     | H62C  | ..H141        | .     | 1.77 Ang.  |
|                   |                                                            |       | 1-x,2-y,2-z = | 2_677 | Check      |
| PLAT432_ALERT_2_G | Short Inter X...Y Contact                                  | C60   | ..C141        | .     | 3.19 Ang.  |
|                   |                                                            |       | 1-x,2-y,2-z = | 2_677 | Check      |
| PLAT432_ALERT_2_G | Short Inter X...Y Contact                                  | C62   | ..C141        | .     | 2.85 Ang.  |
|                   |                                                            |       | 1-x,2-y,2-z = | 2_677 | Check      |
| PLAT432_ALERT_2_G | Short Inter X...Y Contact                                  | C62   | ..C142        | .     | 2.94 Ang.  |
|                   |                                                            |       | 1-x,2-y,2-z = | 2_677 | Check      |
| PLAT789_ALERT_4_G | Atoms with Negative _atom_site_disorder_group #            |       |               |       | 24 Check   |
| PLAT811_ALERT_5_G | No ADDSYM Analysis: Too Many Excluded Atoms ....           |       |               |       | ! Info     |
| PLAT822_ALERT_4_G | CIF-embedded .res Contains Negative PART Numbers           |       |               |       | 2 Check    |
| PLAT860_ALERT_3_G | Number of Least-Squares Restraints .....                   |       |               |       | 3651 Note  |
| PLAT910_ALERT_3_G | Missing # of FCF Reflection(s) Below Theta(Min).           |       |               |       | 2 Note     |
|                   | 0 0 1, 0 0 2,                                              |       |               |       |            |
| PLAT912_ALERT_4_G | Missing # of FCF Reflections Above STh/L= 0.600            |       |               |       | 723 Note   |
| PLAT933_ALERT_2_G | Number of HKL-OMIT Records in Embedded .res File           |       |               |       | 1 Note     |
|                   | -1 0 5,                                                    |       |               |       |            |
| PLAT941_ALERT_3_G | Average HKL Measurement Multiplicity .....                 |       |               |       | 1.7 Low    |
| PLAT969_ALERT_5_G | The 'Henn et al.' R-Factor-gap value .....                 |       |               |       | 4.649 Note |
|                   | Predicted wR2: Based on SigI**2 3.39 or SHELX Weight 15.50 |       |               |       |            |
| PLAT978_ALERT_2_G | Number C-C Bonds with Positive Residual Density.           |       |               |       | 8 Info     |
| PLAT992_ALERT_5_G | Repd & Actual _reflns_number_gt Values Differ by           |       |               |       | 3 Check    |

---

0 **ALERT level A** = Most likely a serious problem - resolve or explain  
 0 **ALERT level B** = A potentially serious problem, consider carefully  
 11 **ALERT level C** = Check. Ensure it is not caused by an omission or oversight  
 47 **ALERT level G** = General information/check it is not something unexpected

2 ALERT type 1 CIF construction/syntax error, inconsistent or missing data  
 21 ALERT type 2 Indicator that the structure model may be wrong or deficient  
 18 ALERT type 3 Indicator that the structure quality may be low  
 14 ALERT type 4 Improvement, methodology, query or suggestion  
 3 ALERT type 5 Informative message, check

---

It is advisable to attempt to resolve as many as possible of the alerts in all categories. Often the minor alerts point to easily fixed oversights, errors and omissions in your CIF or refinement strategy, so attention to these fine details can be worthwhile. In order to resolve some of the more serious problems it may be necessary to carry out additional measurements or structure refinements. However, the purpose of your study may justify the reported deviations and the more serious of these should normally be commented upon in the discussion or experimental section of a paper or in the "special\_details" fields of the CIF. checkCIF was carefully designed to identify outliers and unusual parameters, but every test has its limitations and alerts that are not important in a particular case may appear. Conversely, the absence of alerts does not guarantee there are no aspects of the results needing attention. It is up to the individual to critically assess their own results and, if necessary, seek expert advice.

### **Publication of your CIF in IUCr journals**

A basic structural check has been run on your CIF. These basic checks will be run on all CIFs submitted for publication in IUCr journals (*Acta Crystallographica*, *Journal of Applied Crystallography*, *Journal of Synchrotron Radiation*); however, if you intend to submit to *Acta Crystallographica Section C* or *E* or *IUCrData*, you should make sure that full publication checks are run on the final version of your CIF prior to submission.

### **Publication of your CIF in other journals**

Please refer to the *Notes for Authors* of the relevant journal for any special instructions relating to CIF submission.

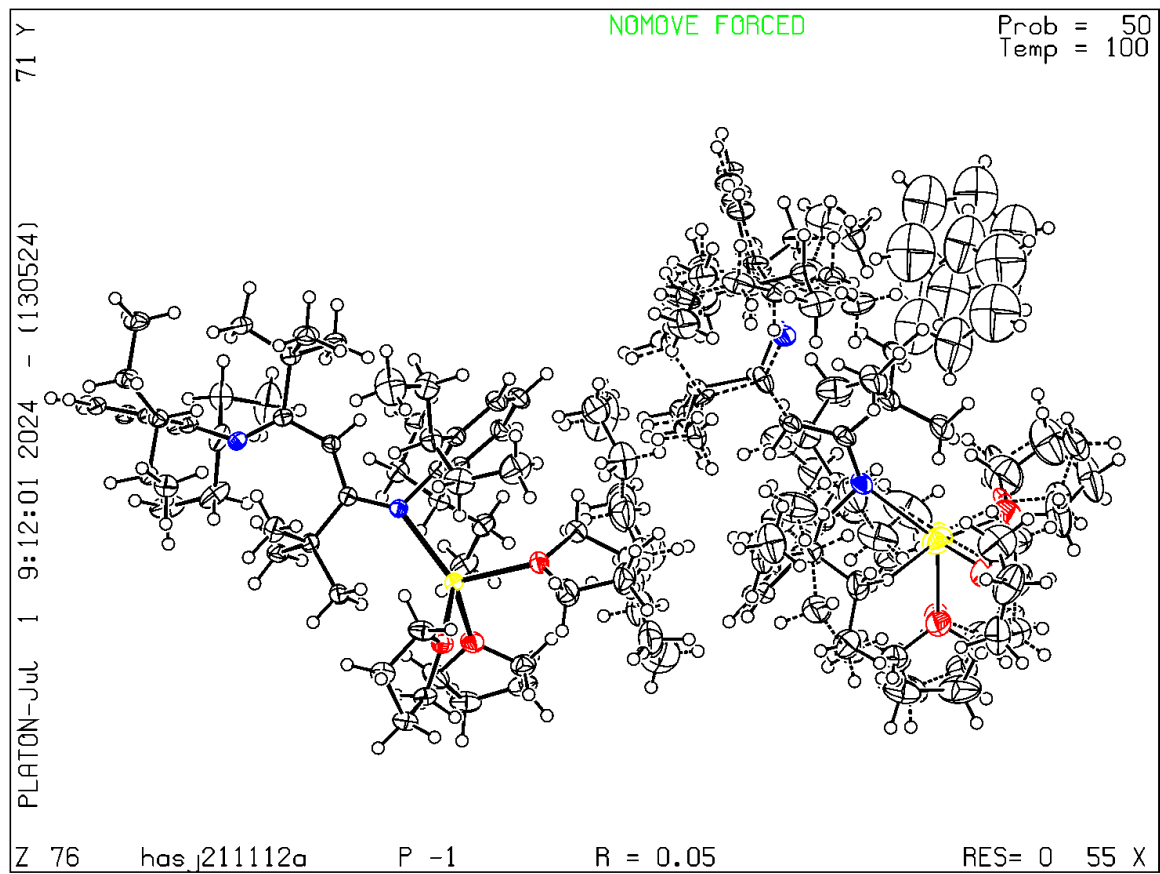

Supplement: Supplementary file 1 [file 73c8281567377733606e04b3.pdf]
